# Supplementary material for: Prediction of Pulmonary Function in Patients with Chronic Obstructive Pulmonary Disease: Correlation with Quantitative CT Parameters
Source: PubMed Central journal article supplement — Korean J Radiol. 2019 Mar 11;20(4):683–92. doi: 10.3348/kjr.2018.0391 (PMC6424824; doi:10.3348/kjr.2018.0391), 2019-03-11
Supplement: kjr-20-683-s002.pdf [file kjr-20-683-s002.pdf]

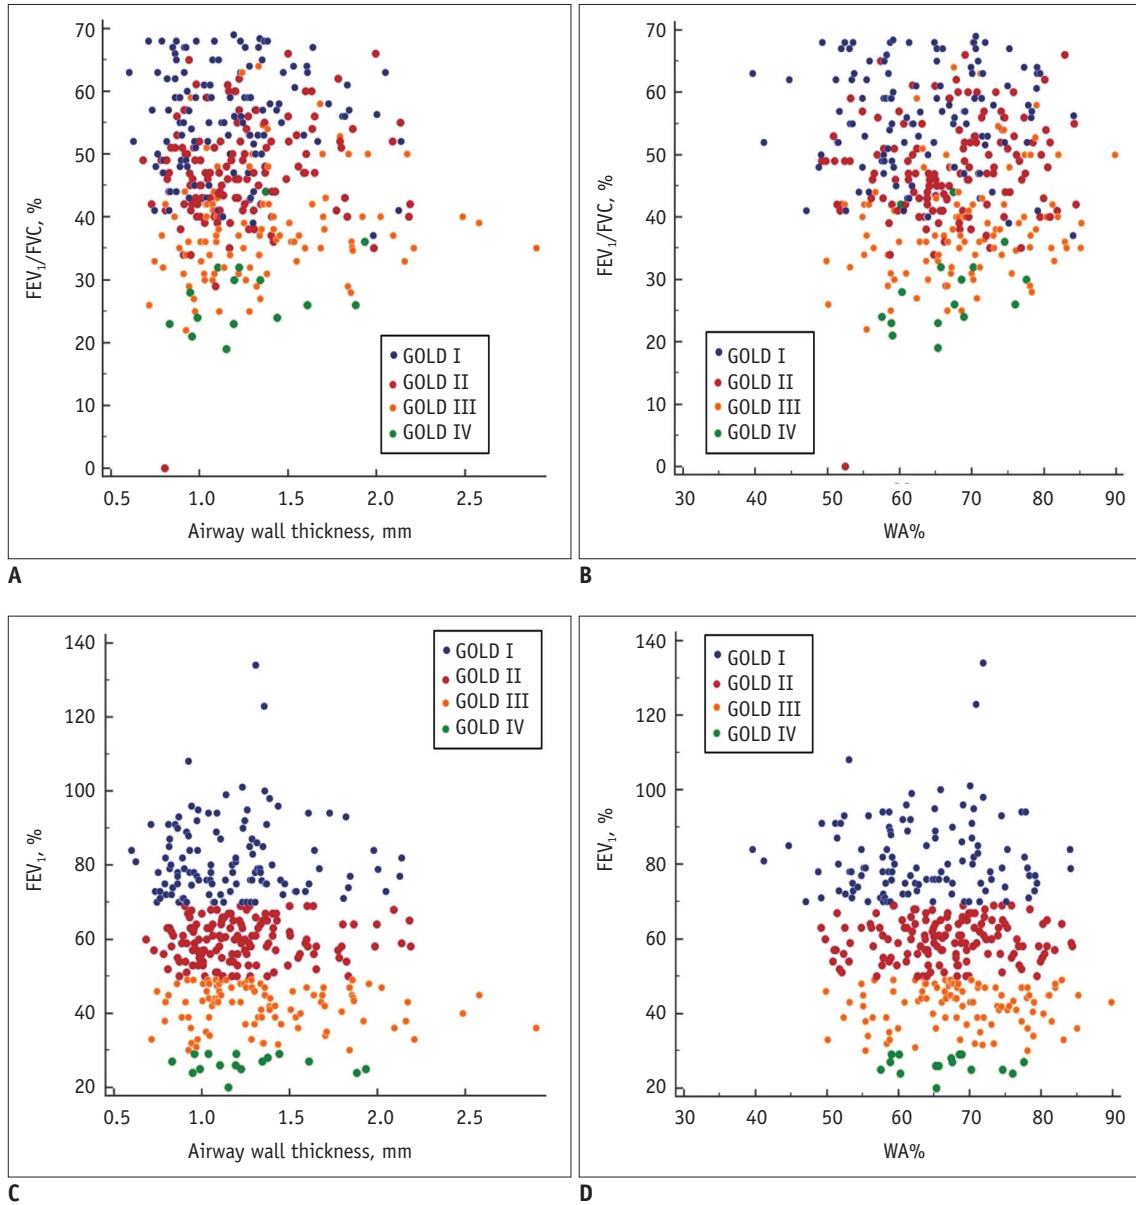

**Supplementary Fig. 2. Scatter plots demonstrate distribution of four GOLD stages between airway wall thickness (A, C) or WA% (B, D) and pulmonary function indices. WA% = wall area percentage**
